## Corrigendum

# **PTX3 plays a key role in the organization of the cumulus oophorus extracellular matrix and in in vivo fertilization**

Antonietta Salustri, Cecilia Garlanda, Emilio Hirsch, Marika De Acetis, Alessia Maccagno, Barbera Bottazzi, Andrea Doni, Antonio Bastone, Giovanna Mantovani, Paolo Beck Peccoz, Giovanni Salvatori, David J. Mahoney, Anthony J. Day, Gregorio Siracusa, Luigina Romani and Alberto Mantovani *Development* **131**, 1577-1586.

The address of one of the authors was incorrectly supplied for this article.

The correct address is:

<sup>4</sup>Institute of Endocrine Sciences, Ospedale Maggiore IRCCS, University of Milan, Milan 20100, Italy

The authors apologise to readers for this mistake.
